# Supplementary material for: Ovarian cancer staging and follow-up: updated guidelines from the European Society of Urogenital Radiology female pelvic imaging working group
Source: Springer Nature journal article supplement (doi:10.1007/s00330-024-11300-7), 2025-01-11
Supplement: MOESM1 [file 330_2024_11300_MOESM1_ESM.pdf]

# Ovarian cancer staging and follow-up: updated guidelines from the European Society of Urogenital Radiology Female Pelvic Imaging working group

## ELECTRONIC SUPPLEMENTARY MATERIAL

**Supplementary Table 1.** Details on CT and MRI protocols

| CT                   |                                                                                                       |
|----------------------|-------------------------------------------------------------------------------------------------------|
| Hardware requirement | Multislice CT (>16 slices)                                                                            |
| Preparation          | No fasting                                                                                            |
|                      | No spasmolytic agent                                                                                  |
|                      | No oral contrast                                                                                      |
| Coverage             | Thorax*, abdomen and pelvis                                                                           |
| Contrast phases      | Portal-venous phase                                                                                   |
|                      | Non contrast, arterial and delayed phases did not reach consensus.                                    |
|                      | If low-grade is suspected: non-contrast phase may be indicated to detect calcified peritoneal lesions |
| Post-processing      | Coronal and sagittal reconstructions                                                                  |

| MRI                                          |                                              |                       |
|----------------------------------------------|----------------------------------------------|-----------------------|
| Hardware requirement                         | Field strength at least 1.5T or higher       |                       |
| Preparation                                  | No fasting                                   |                       |
|                                              | No voiding urinary bladder before the exam   |                       |
|                                              | Do not schedule according to menstrual cycle |                       |
|                                              | No vaginal or rectal opacification           |                       |
|                                              | Use of spasmolytic agent is recommended      |                       |
| Coverage                                     | Abdomen and pelvis                           |                       |
| Sequence                                     | Plane                                        | Specifications        |
| T2 without fat saturation (FS) of the pelvis | Axial                                        | Slice thickness ≤5 mm |
| T2 without FS of the pelvis                  | Sagittal                                     | Slice thickness ≤4 mm |
| T1 without FS of the pelvis                  | Axial                                        | Slice thickness ≤5 mm |
| T1 with FS of the pelvis                     | Axial                                        | Slice thickness ≤5 mm |
| DWI of the pelvis                            | Axial                                        | Slice thickness ≤5 mm |

|                                     |       |                                                       |
|-------------------------------------|-------|-------------------------------------------------------|
|                                     |       | B-value of 0-50 and 800-1000                          |
| T2 without FS of the abdomen        | Axial | Slice thickness ≤5 mm                                 |
| T1 without FS of the abdomen        | Axial | Slice thickness ≤5 mm                                 |
| DWI of the abdomen                  | Axial | Slice thickness ≤5 mm<br>B-value of 0-50 and 800-1000 |
| Contrast enhanced T1 of the pelvis  | Axial | Slice thickness ≤3 mm                                 |
| Contrast enhanced T1 of the abdomen | Axial | Slice thickness ≤3 mm                                 |

**Supplementary Table 2.** Structured report highlighting the changes compared to the 2010 guidelines [6]

| 2010 structured reporting [6]                                                                                                          | 2024 reporting aligned to [10]                                                                                                                                                          |
|----------------------------------------------------------------------------------------------------------------------------------------|-----------------------------------------------------------------------------------------------------------------------------------------------------------------------------------------|
| <i>Adnexa</i>                                                                                                                          |                                                                                                                                                                                         |
| Size, morphology and uni- or bilaterality of the ovarian mass with a statement of whether the mass demonstrates features of malignancy | Description of adnexal lesion: unilateral, bilateral, cystic, solid component (solid tissue; other solid components). Statement of whether the mass demonstrates features of malignancy |
| Uterine endometrial thickening                                                                                                         | //                                                                                                                                                                                      |
| <i>Peritoneal carcinomatosis</i>                                                                                                       |                                                                                                                                                                                         |
| Bladder, bowel invasion or pelvic side-wall invasion                                                                                   | Peritoneal carcinomatosis in the pelvis: paravesical spaces, bowel, pelvic sidewall, pouch of Douglas                                                                                   |
| Omental metastases                                                                                                                     | Greater Omentum                                                                                                                                                                         |
| Site and size of other peritoneal/serosal implants outside the pelvis                                                                  | Peritoneal carcinomatosis outside the pelvis, including the paracolic gutters                                                                                                           |
| Involvement of the small bowel mesentery                                                                                               | Mesentery (Root of mesentery involvement; pattern: nodular or infiltrative (retractile))                                                                                                |
| Supracolic sites of disease including the gastrohepatic, gastrosplenic and splenocolic ligaments                                       | Gastrocolic ligament<br>Gastrosplenic ligament<br>Lesser omentum<br>Lesser sac                                                                                                          |
| Surface, subcapsular or parenchymal metastases                                                                                         | Subdiaphragmatic lesions<br>Perihepatic lesions                                                                                                                                         |

|                                                                                                                                                                                          |                                                                                                                                                                                                                                                                                                                                                                                                                                                                                                                                                                                                                                                                                                  |
|------------------------------------------------------------------------------------------------------------------------------------------------------------------------------------------|--------------------------------------------------------------------------------------------------------------------------------------------------------------------------------------------------------------------------------------------------------------------------------------------------------------------------------------------------------------------------------------------------------------------------------------------------------------------------------------------------------------------------------------------------------------------------------------------------------------------------------------------------------------------------------------------------|
|                                                                                                                                                                                          | Perisplenic lesions                                                                                                                                                                                                                                                                                                                                                                                                                                                                                                                                                                                                                                                                              |
| <i>Metastatic disease other than peritoneal carcinomatosis</i>                                                                                                                           |                                                                                                                                                                                                                                                                                                                                                                                                                                                                                                                                                                                                                                                                                                  |
| Invasion of the abdominal wall                                                                                                                                                           | Abdominal wall                                                                                                                                                                                                                                                                                                                                                                                                                                                                                                                                                                                                                                                                                   |
| Liver and spleen metastases                                                                                                                                                              | Hepatic parenchyma<br>Splenic parenchyma                                                                                                                                                                                                                                                                                                                                                                                                                                                                                                                                                                                                                                                         |
|                                                                                                                                                                                          | Pulmonary nodules<br>Pleuric nodules<br>Other visceral lesions                                                                                                                                                                                                                                                                                                                                                                                                                                                                                                                                                                                                                                   |
| <i>Lymph nodes</i>                                                                                                                                                                       |                                                                                                                                                                                                                                                                                                                                                                                                                                                                                                                                                                                                                                                                                                  |
| <p>Cardiophrenic lymph nodes with a short-axis diameter of &gt;5 mm</p> <p>Site of lymph nodes with a short-axis diameter of &gt;1 cm, or suspicious clusters of smaller lymph nodes</p> | <p><i>Thoracic lymphadenopathies (short axis <math>\geq 10</math> mm)</i></p> <p>Supraclavicular, mediastinal, hilar, axillary (short-axis diameter <math>\geq 10</math> mm)</p> <p>Internal mammary, cardio-phrenic, retrocrural lymph nodes (short axis <math>\geq 5</math> mm)</p> <p><i>Abdominal lymph nodes (short axis &gt;10 mm)</i></p> <p>Abdominal lymph nodes (short axis <math>\geq 10</math> mm)</p> <ul style="list-style-type: none"> <li>- Upper abdominal (above the renal arteries)</li> <li>- Retroperitoneal (infra-renal para-aortic, intercavaoortic)</li> <li>- Mesenteric</li> <li>- Pelvic</li> </ul> <p>Inguinal lymph nodes (short axis <math>\geq 15</math> mm)</p> |
| <i>Fluids collection</i>                                                                                                                                                                 |                                                                                                                                                                                                                                                                                                                                                                                                                                                                                                                                                                                                                                                                                                  |
| Presence and size of pleural effusion                                                                                                                                                    | Pleural effusion volume (small/large or small/medium/large)                                                                                                                                                                                                                                                                                                                                                                                                                                                                                                                                                                                                                                      |
| Ascites in the pelvis or upper abdomen, and amount of ascites                                                                                                                            | Ascites volume (small/large or small/medium/large)                                                                                                                                                                                                                                                                                                                                                                                                                                                                                                                                                                                                                                               |
| <i>Complications</i>                                                                                                                                                                     |                                                                                                                                                                                                                                                                                                                                                                                                                                                                                                                                                                                                                                                                                                  |
| Evidence of complications such as bowel obstruction, hydronephrosis or venous obstruction/thrombosis                                                                                     | Evidence of complications such as bowel obstruction, hydronephrosis or venous obstruction/thrombosis                                                                                                                                                                                                                                                                                                                                                                                                                                                                                                                                                                                             |
